# Supplementary material
Source: PubMed Central journal article supplement (PMC10308295)
Supplement: jamadermatol-e231729-s001.pdf [file jamadermatol-e231729-s001.pdf]

## Supplemental Online Content

Lescoat A, Huang S, Carreira PE, et al; for the EUSTAR collaborators. Cutaneous manifestations, clinical characteristics, and prognosis of patients with systemic sclerosis sine scleroderma: data from the international EUSTAR database. *JAMA Dermatol*. Published online June 28, 2023. doi:10.1001/jamadermatol.2023.1729

### eMethods

**eFigure:** Flow Chart and selection strategy

**eTable 1:** Clinical characteristics associated with Puffy fingers (ever) in sine scleroderma patients (ssSSc)

**eTable 2:** Comparison of the clinical characteristics of ssSSc with lcSSc and dcSSc with same disease duration at last available visit

**eTable 3:** Comparison of the clinical characteristics of ssSSc (with Lung fibrosis/ILD) with lcSSc with Lung fibrosis/ILD) and dcSSc with Lung fibrosis/ILD)

**eTable 4:** Clinical characteristics associated with ILD and/or Lung Fibrosis ever (i.e. history of ILD and/or Lung Fibrosis at inclusion and/or ILD and/or Lung Fibrosis during follow-up) in sine scleroderma patients (ssSSc)

This supplemental material has been provided by the authors to give readers additional information about their work.

## eMethods

We explored demographics, disease characteristics, cardio-pulmonary features, disease activity, and immunological findings among patients with ssSSc at inclusion visit. Quantitative variables were expressed using mean and standard deviation (SD) in case of Gaussian distribution, and median and first and third quartiles in case of non-Gaussian distribution. Qualitative variables were expressed as numbers and percentages. We compared these characteristics among ssSSc patients with lcSSc patients and dcSSc patients, respectively, at last available visit. Comparison between groups were assessed using T-test for quantitative variables with Gaussian distribution, Wilcoxon rank sum test for quantitative variables with non-Gaussian distribution, and Chi<sup>2</sup> or Fisher exact test as appropriate for qualitative variables. Logistic regressions were used to explore the association between variables at last available visit and ssSSc with DU vs. ssSSc without DU, ssSSc with Puffy fingers vs. ssSSc without Puffy Fingers, ssSSc with Telangiectasia vs. ssSSc without Telangiectasia, ILD vs. ssSSc without ILD. A univariate model was fitted for each of the variables; a multivariate model was fitted including all variables with P<0.2 in their univariate models and excluding variables with 1/3 of missing data. Odds Ratios and 95% CIs were reported for logistic regression. All analyses described above were conducted in SAS (version 9.4). Time to event analysis was conducted for all-cause mortality. We plotted survival curves by SSc group and did pairwise comparisons between ssSSc, lcSSc and dcSSc. Figures were plotted via R package “survival” and “survminer” (R version 4.0.2). We performed all tests with a significance level of P<0.05.

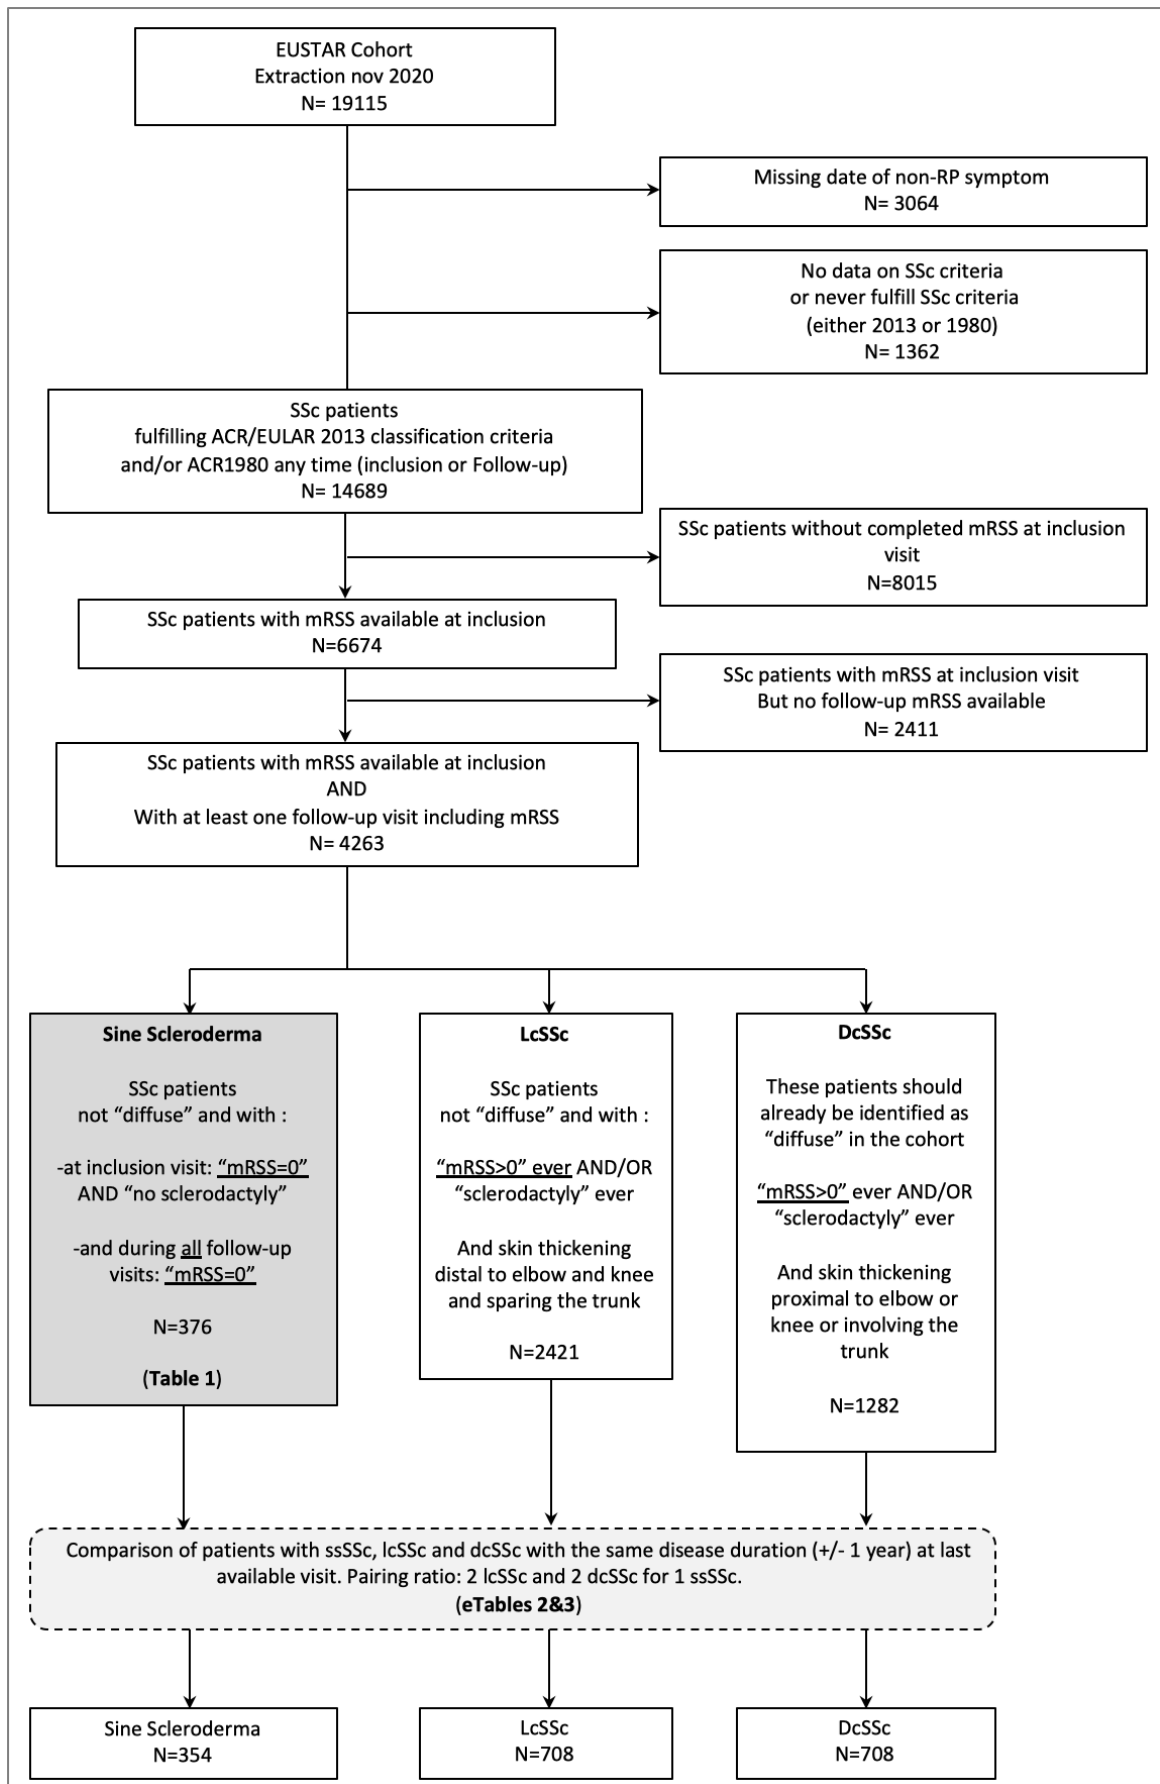

**eFigure 1:** Flow Chart and selection strategy

**eTable 1: Clinical characteristics associated with Puffy fingers (ever) in sine scleroderma patients (ssSSc).**

| Characteristics of ssSSc patients at last visit (n=353)        | Univariate modeling for Puffy fingers (ever versus never) |         | Multivariable modeling for Puffy fingers (ever versus never) |         |
|----------------------------------------------------------------|-----------------------------------------------------------|---------|--------------------------------------------------------------|---------|
|                                                                | Odds Ratio (95% CI)                                       | P-value | Odds Ratio (95% CI)                                          | P-value |
| Age at last visit (years)                                      | 1.011 (0.996, 1.027)                                      | 0.1500  | 0.971 (0.947, 0.996)                                         | 0.0237  |
| Gender (ref=Female)                                            | 0.839 (0.391, 1.799)                                      | 0.6513  |                                                              |         |
| Disease duration since RP onset (years) (last visit)           | 1.009 (0.989, 1.029)                                      | 0.3954  |                                                              |         |
| Raynaud's Phenomenon (ref=Never)                               | 2.009 (0.125, 32.400)                                     | 0.6230  |                                                              |         |
| Telangiectasia (ref=Never)                                     | 1.013 (0.635, 1.616)                                      | 0.9579  |                                                              |         |
| Pitting scars (ref=Never)                                      | 1.040 (0.646, 1.674)                                      | 0.8720  |                                                              |         |
| <b>DU (ref=Never)</b>                                          | 1.085 (0.661, 1.780)                                      | 0.7476  |                                                              |         |
| Joint synovitis (ref=Never)                                    | 1.515 (0.838, 2.742)                                      | 0.1694  | 0.518 (0.189, 1.419)                                         | 0.2007  |
| Tendon friction rubs (ref=Never)                               | 0.689 (0.313, 1.520)                                      | 0.3565  |                                                              |         |
| CK-elevation (ref=Never)                                       | 1.315 (0.627, 2.759)                                      | 0.4687  |                                                              |         |
| Esophageal symptoms (ref=Never)                                | 1.182 (0.728, 1.919)                                      | 0.4996  |                                                              |         |
| Stomach symptoms (ref=Never)                                   | 0.942 (0.605, 1.466)                                      | 0.7901  |                                                              |         |
| Intestinal symptoms (ref=Never)                                | 1.196 (0.784, 1.826)                                      | 0.4063  |                                                              |         |
| History of scleroderma renal crisis (ref=Never)                | 0.847 (0.235, 3.056)                                      | 0.7997  |                                                              |         |
| Proteinuria (ref=Never)                                        | 0.689 (0.358, 1.327)                                      | 0.2655  |                                                              |         |
| Lung fibrosis on X-Rays or HRCT or presence of ILD (ref=Never) | 1.216 (0.786, 1.881)                                      | 0.3798  |                                                              |         |
| Significant dyspnea (ref=Never)                                | 0.668 (0.375, 1.191)                                      | 0.1715  | 2.757 (1.066, 7.133)                                         | 0.0365  |
| ppDLCO (last visit)                                            | 1.006 (0.992, 1.020)                                      | 0.4314  |                                                              |         |
| ppFVC (last visit)                                             | 1.021 (1.009, 1.033)                                      | 0.0007  | 1.002 (0.984, 1.019)                                         | 0.8645  |
| ppTLC (last visit)                                             | 1.009 (0.994, 1.024)                                      | 0.2417  |                                                              |         |
| sPAP >40mmHg (ref=Never)                                       | 1.393 (0.663, 2.926)                                      | 0.3818  |                                                              |         |
| Pulmonary hypertension (ref=Never)                             | 0.866 (0.468, 1.602)                                      | 0.6464  |                                                              |         |
| Left ventricular ejection fraction (last visit)                | 0.989 (0.941, 1.040)                                      | 0.6792  |                                                              |         |
| Diastolic heart dysfunction (ref=Never)                        | 1.116 (0.714, 1.745)                                      | 0.6306  |                                                              |         |
| Conduction block (ref=Never)                                   | 0.825 (0.463, 1.469)                                      | 0.5127  |                                                              |         |
| EScSG disease activity index (2001) (last visit)               | 0.855 (0.632, 1.157)                                      | 0.3093  |                                                              |         |
| EScSG disease activity index (2016) (last visit)               | 1.198 (0.785, 1.827)                                      | 0.4027  |                                                              |         |
| ANA+ (ref=Negative)                                            | 1.445 (0.381, 5.476)                                      | 0.5881  |                                                              |         |
| ACA+ (ref=Negative)                                            | 1.873 (1.207, 2.906)                                      | 0.0051  | 1.157 (0.541, 2.475)                                         | 0.7070  |
| ATA+ (ref=Negative)                                            | 0.953 (0.537, 1.690)                                      | 0.8691  |                                                              |         |
| RNA (ref=Negative)                                             | 1.152 (0.347, 3.830)                                      | 0.8169  |                                                              |         |
| PmScl+ (ref=Negative)                                          | 0.925 (0.307, 2.782)                                      | 0.8891  |                                                              |         |
| U1RNP+ (ref=Negative)                                          | 0.323 (0.122, 0.856)                                      | 0.0231  | 2.205 (0.529, 9.196)                                         | 0.2777  |
| CRP >5mg/L (ref=Never)                                         | 0.530 (0.242, 1.157)                                      | 0.1108  | 0.827 (0.209, 3.266)                                         | 0.7864  |

ACA: anti-centromere antibodies ; ANA: Antinuclear antibodies ; ATA: anti-topoisomerase I antibodies ; CK: creatinine-phospho-kinase ; CRP: C-reactive Protein ; DLCO: Diffusion capacities of carbon-monoxide ; DU: digital Ulcers ; EScSG: European Systemic Sclerosis research group ; FVC: Forced Vital Capacity ; HRCT: High resolution computed tomography ; ILD: Interstitial lung disease ; MMF: Mycophenolate mofetil ; MTX: Methotrexate ; RNA pol III: anti RNA polymerase III antibodies ; RP: Raynaud's Phenomenon ; SD : standard deviation ; sPAP: systolic Pulmonary Arterial Pressure ; SSc: systemic sclerosis ; ssSSc: Systemic sclerosis sine scleroderma ; TLC: Total Lung capacities ; U1-RNP: Anti U1 ribonuclease protein antibodies

**eTable 2: Comparison of the clinical characteristics of ssSSc with lcSSc and dcSSc with same disease duration at last available visit.**

| Characteristics at last visit<br>n, (%) or mean (SD)                        | ssSSc<br>N=354        |             | lcSSc<br>N=708        |             |                             | dcSSc<br>N=708        |             |                             |
|-----------------------------------------------------------------------------|-----------------------|-------------|-----------------------|-------------|-----------------------------|-----------------------|-------------|-----------------------------|
|                                                                             | <i>Data available</i> | Statistics  | <i>Data available</i> | Statistics  | P-value<br>(ssSSc vs lcSSc) | <i>Data available</i> | Statistics  | P-value<br>(ssSSc vs dcSSc) |
| <i>Demographics</i>                                                         |                       |             |                       |             |                             |                       |             |                             |
| Age at last visit (years), mean (SD)                                        | 354/354               | 58.4 (13.9) | 708/708               | 58.8 (13.0) | 0.6193                      | 708/708               | 55.4 (13.4) | 0.0007                      |
| Male gender, n (%)                                                          | 354/354               | 31 (8.8%)   | 708/708               | 111 (15.7%) | 0.0018                      | 708/708               | 182 (25.7%) | <.0001                      |
| Follow-up duration (years), mean (SD)                                       | 354/354               | 3.6 (3.2)   | 708/708               | 4.4 (3.6)   | 0.0002                      | 708/708               | 4.3 (3.1)   | <.0001                      |
| Disease duration since first non-RP symptom (years) (last visit), mean (SD) | 354/354               | 10.3 (7.2)  | 708/708               | 10.3 (7.2)  | 0.9911                      | 708/708               | 10.3 (7.2)  | 0.9968                      |
| Disease duration since RP onset (years) (last visit), mean (SD)             | 329/354               | 14.3 (10.8) | 657/708               | 14.2 (10.4) | 0.9714                      | 669/708               | 12.5 (9.1)  | 0.0222                      |
| <i>Disease characteristics</i>                                              |                       |             |                       |             |                             |                       |             |                             |
| <i>Skin manifestations</i>                                                  |                       |             |                       |             |                             |                       |             |                             |
| Raynaud's Phenomenon (ever), n (%)                                          | 333/354               | 331 (99.4%) | 664/708               | 656 (98.8%) | 0.5099                      | 682/708               | 672 (98.5%) | 0.3558                      |
| Telangiectasia (ever), n (%)                                                | 336/354               | 221 (65.8%) | 609/708               | 455 (74.7%) | 0.0036                      | 607/708               | 484 (79.7%) | <.0001                      |
| DU (ever), n (%)                                                            | 333/354               | 94 (28.2%)  | 604/708               | 321 (53.1%) | <.0001                      | 608/708               | 415 (68.3%) | <.0001                      |
| Pitting scars (ever), n (%)                                                 | 332/354               | 105 (31.6%) | 601/708               | 391 (65.1%) | <.0001                      | 601/708               | 463 (77.0%) | <.0001                      |
| Puffy fingers (ever), n (%)                                                 | 351/354               | 224 (63.8%) | 703/708               | 579 (82.4%) | <.0001                      | 700/708               | 613 (87.6%) | <.0001                      |
| mRSS (last visit), mean (SD)                                                | 320/354               | 0.0 (0.0)   | 551/708               | 5.8 (6.0)   | <.0001                      | 571/708               | 14.1 (9.4)  | <.0001                      |
| <i>Other manifestations</i>                                                 |                       |             |                       |             |                             |                       |             |                             |
| Joint synovitis (ever), n (%)                                               | 354/354               | 60 (16.9%)  | 708/708               | 172 (24.3%) | 0.0063                      | 708/708               | 218 (30.8%) | <.0001                      |
| Tendon friction rubs (ever), n(%)                                           | 354/354               | 26 (7.3%)   | 706/708               | 101 (14.3%) | 0.0010                      | 706/708               | 215 (30.5%) | <.0001                      |
| Muscle weakness (ever), n (%)                                               | 354/354               | 86 (24.3%)  | 708/708               | 195 (27.5%) | 0.2579                      | 707/708               | 315 (44.6%) | <.0001                      |
| CK-elevation (ever), n (%)                                                  | 296/354               | 36 (12.2%)  | 644/708               | 79 (12.3%)  | 0.9636                      | 663/708               | 146 (22.0%) | 0.0003                      |
| Esophageal symptoms (ever), n (%)                                           | 354/354               | 265 (74.9%) | 708/708               | 564 (79.7%) | 0.0746                      | 708/708               | 622 (87.9%) | <.0001                      |

|                                                                  |         |              |         |             |        |         |             |        |
|------------------------------------------------------------------|---------|--------------|---------|-------------|--------|---------|-------------|--------|
| Stomach symptoms (ever), n (%)                                   | 354/354 | 123 (34.7%)  | 707/708 | 295 (41.7%) | 0.0282 | 708/708 | 383 (54.1%) | <.0001 |
| Intestinal symptoms (ever), n (%)                                | 354/354 | 182 (51.4%)  | 707/708 | 326 (46.1%) | 0.1031 | 707/708 | 354 (50.1%) | 0.6802 |
| History of scleroderma renal crisis (ever), n (%)                | 354/354 | 10 (2.8%)    | 708/708 | 16 (2.3%)   | 0.5744 | 708/708 | 35 (4.9%)   | 0.1062 |
| Proteinuria (ever), n (%)                                        | 336/354 | 40 (11.9%)   | 680/708 | 96 (14.1%)  | 0.3298 | 685/708 | 126 (18.4%) | 0.0083 |
| Lung fibrosis on X-Rays or HRCT or presence of ILD (ever), n (%) | 331/354 | 165 (49.8%)  | 666/708 | 380 (57.1%) | 0.0313 | 691/708 | 518 (75.0%) | <.0001 |
| DLCO (%pred) (last visit), mean (SD)                             | 214/354 | 71.9 (19.7)  | 420/708 | 67.2 (19.7) | 0.0045 | 418/708 | 60.0 (19.9) | <.0001 |
| FVC (%pred) (last visit), mean (SD)                              | 241/354 | 100.4 (22.2) | 463/708 | 92.5 (20.7) | <.0001 | 469/708 | 82.4 (22.6) | <.0001 |
| TLC (%pred) (last visit), mean (SD)                              | 175/354 | 101.7 (20.8) | 355/708 | 93.3 (19.0) | <.0001 | 351/708 | 83.9 (21.1) | <.0001 |
| sPAP >40mmHg, echocardiography (ever), n (%)                     | 298/354 | 32 (10.7%)   | 586/708 | 107 (18.3%) | 0.0037 | 604/708 | 127 (21.0%) | 0.0001 |
| Pulmonary hypertension (ever), n (%)                             | 310/354 | 47 (15.2%)   | 633/708 | 151 (23.9%) | 0.0021 | 649/708 | 186 (28.7%) | <.0001 |
| Left ventricular ejection fraction (%) (last visit), mean (SD)   | 219/354 | 61.0 (5.5)   | 416/708 | 61.3 (7.4)  | 0.2501 | 433/708 | 59.9 (8.2)  | 0.5450 |
| Diastolic heart dysfunction (ever), n (%)                        | 327/354 | 133 (40.7%)  | 652/708 | 293 (44.9%) | 0.2042 | 667/708 | 275 (41.2%) | 0.8669 |
| Conduction block (ever), n (%)                                   | 305/354 | 51 (16.7%)   | 641/708 | 152 (23.7%) | 0.0144 | 671/708 | 201 (30.0%) | <.0001 |
| <i>Disease activity at last available visit</i>                  |         |              |         |             |        |         |             |        |
| EScSG disease activity index (2001) (last visit), mean (SD)      | 191/354 | 0.7 (0.9)    | 371/708 | 1.3 (1.4)   | <.0001 | 425/708 | 2.1 (1.8)   | <.0001 |
| EScSG disease activity index (2016) (last visit), mean (SD)      | 354/354 | 0.2 (0.6)    | 708/708 | 0.3 (0.9)   | 0.0297 | 708/708 | 0.5 (1.3)   | 0.0017 |
| <i>Immunological findings</i>                                    |         |              |         |             |        |         |             |        |
| ANA+ (ever), n (%)                                               | 352/354 | 343 (97.4%)  | 706/708 | 693 (98.2%) | 0.4422 | 702/708 | 678 (96.6%) | 0.4485 |
| ACA+ (ever), n (%)                                               | 347/354 | 214 (61.7%)  | 688/708 | 288 (41.9%) | <.0001 | 680/708 | 111 (16.3%) | <.0001 |
| ATA+ (ever), n (%)                                               | 348/354 | 60 (17.2%)   | 697/708 | 278 (39.9%) | <.0001 | 689/708 | 419 (60.8%) | <.0001 |
| RNA pol III+ (ever), n (%)                                       | 308/354 | 13 (4.2%)    | 509/708 | 26 (5.1%)   | 0.5643 | 539/708 | 68 (12.6%)  | <.0001 |
| PmScl+ (ever), n (%)                                             | 290/354 | 15 (5.2%)    | 495/708 | 17 (3.4%)   | 0.2346 | 536/708 | 39 (7.3%)   | 0.2430 |
| U1RNP+ (ever), n (%)                                             | 322/354 | 19 (5.9%)    | 619/708 | 35 (5.7%)   | 0.8775 | 615/708 | 20 (3.3%)   | 0.0539 |
| CRP >5mg/L (ever), n (%)                                         | 314/354 | 27 (8.6%)    | 538/708 | 50 (9.3%)   | 0.7329 | 495/708 | 56 (11.3%)  | 0.2150 |
| <i>Therapeutics</i>                                              |         |              |         |             |        |         |             |        |

|                                           |         |             |         |             |        |         |             |        |
|-------------------------------------------|---------|-------------|---------|-------------|--------|---------|-------------|--------|
| Immunomodulatory therapies (ever)*, n (%) | 338/354 | 167 (49.4%) | 611/708 | 392 (64.2%) | <.0001 | 612/708 | 459 (75.0%) | <.0001 |
| MMF (ever), n (%)                         | 338/354 | 15 (4.4%)   | 611/708 | 51 (8.3%)   | 0.0234 | 612/708 | 85 (13.9%)  | <.0001 |
| MTX (ever), n (%)                         | 338/354 | 47 (13.9%)  | 611/708 | 169 (27.7%) | <.0001 | 612/708 | 208 (34.0%) | <.0001 |
| Corticosteroids (ever), n (%)             | 338/354 | 127 (37.6%) | 611/708 | 227 (37.2%) | 0.8976 | 612/708 | 311 (50.8%) | <.0001 |
| Cyclophosphamide (ever), n (%)            | 338/354 | 28 (8.3%)   | 611/708 | 86 (14.1%)  | 0.0086 | 612/708 | 169 (27.6%) | <.0001 |
| Calcium channel inhibitors (ever), n (%)  | 338/354 | 222 (65.7%) | 611/708 | 388 (63.5%) | 0.5025 | 612/708 | 414 (67.6%) | 0.5373 |
| Sildenafil (ever), n (%)                  | 338/354 | 41 (12.1%)  | 611/708 | 73 (11.9%)  | 0.9340 | 612/708 | 81 (13.2%)  | 0.6260 |
| Bosentan (ever), n (%)                    | 338/354 | 38 (11.2%)  | 611/708 | 102 (16.7%) | 0.0234 | 612/708 | 170 (27.8%) | <.0001 |
| Iloprost (ever), n (%)                    | 338/354 | 32 (9.5%)   | 611/708 | 124 (20.3%) | <.0001 | 612/708 | 157 (25.7%) | <.0001 |

*ACA: anti-centromere antibodies ; ANA: Antinuclear antibodies ; ATA: anti-topoisomerase I antibodies ; CK: creatinine-phospho-kinase ; CRP: C-reactive Protein ; DLCO: Diffusion capacities of carbon-monoxide ; DU: digital Ulcers ; ESeSG: European Systemic Sclerosis research group ; FVC: Forced Vital Capacity ; HRCT: High resolution computed tomography ; ILD: Interstitial lung disease ; MMF: Mycophenolate mofetil ; MTX: Methotrexate ; RNA pol III: anti RNA polymerase III antibodies ; RP: Raynaud's Phenomenon ; SD : standard deviation ; sPAP: systolique Pulmonary Arterial Pressure ; SSc : systemic sclerosis ; ssSSc: Systemic sclerosis sine scleroderma ; TLC: Total Lung capacities ; U1-RNP: Anti U1 ribonuclease protein antibodies*

\*= Abatacept, Abatacept (iv or sc), Enbrel, Golimumab, Humira, Infliximab, JAK kinase inhibitors, Rituximab, TNF-alpha antagonist, Tnf alpha antagonist, Tocilizumab, Tocilizumab (iv or sc), Other biologic therapy, Azathioprine, Cyclosporine A, Cyclophosphamide, D-penicillamine, Chloroquine/Hydroxychloroquine, Imatinib, Leflunomide, Methotrexate, Mycophenolate mofetyl, Prednisone, Sulfasalazine

**eTable 3: Comparison of the clinical characteristics of ssSSc (with Lung fibrosis/ILD) with lcSSc with Lung fibrosis/ILD) and dcSSc with Lung fibrosis/ILD).**

| Characteristics at last visit<br>n, (%) or mean (SD)                        | ssSSc with Lung fibrosis/ILD<br>N=165 |             | lcSSc with Lung fibrosis/ILD<br>N=380 |             |                             | dcSSc with Lung fibrosis/ILD<br>N=518 |             |                             |
|-----------------------------------------------------------------------------|---------------------------------------|-------------|---------------------------------------|-------------|-----------------------------|---------------------------------------|-------------|-----------------------------|
|                                                                             | <i>Data available</i>                 | Statistics  | <i>Data available</i>                 | Statistics  | P-value<br>(ssSSc vs lcSSc) | <i>Data available</i>                 | Statistics  | P-value<br>(ssSSc vs dcSSc) |
| <i>Demographics</i>                                                         |                                       |             |                                       |             |                             |                                       |             |                             |
| Age at last visit (years), mean (SD)                                        | 165/165                               | 61.2 (12.9) | 380/380                               | 60.0 (12.8) | 0.3194                      | 518/518                               | 55.8 (13.4) | <0.0001                     |
| Male gender, n (%)                                                          | 165/165                               | 19 (11.5%)  | 380/380                               | 71 (18.7%)  | 0.0384                      | 518/518                               | 132 (25.5%) | 0.0002                      |
| Follow-up duration (years), mean (SD)                                       | 165/165                               | 4.0 (3.5)   | 380/380                               | 4.8 (3.7)   | 0.0088                      | 518/518                               | 4.4 (3.2)   | 0.0398                      |
| Disease duration since first non-RP symptom (years) (last visit), mean (SD) | 165/165                               | 10.8 (7.8)  | 380/380                               | 10.6 (7.0)  | 0.7440                      | 518/518                               | 10.7 (7.2)  | 0.8681                      |
| Disease duration since RP onset (years) (last visit), mean (SD)             | 149/165                               | 14.8 (10.9) | 356/380                               | 13.7 (9.1)  | 0.5433                      | 497/518                               | 12.8 (8.9)  | 0.0796                      |
| <i>Cardio-pulmonary parameters</i>                                          |                                       |             |                                       |             |                             |                                       |             |                             |
| Significant dyspnea (ever), n (%)                                           | 146/165                               | 33 (22.6%)  | 354/380                               | 97 (27.4%)  | 0.2660                      | 497/518                               | 173 (34.8%) | 0.0055                      |
| DLCO (%pred) (last visit), mean (SD)                                        | 103/165                               | 65.3 (20.6) | 230/380                               | 61.1 (18.2) | 0.0651                      | 306/518                               | 56.2 (19.2) | <0.0001                     |
| FVC (%pred) (last visit), mean (SD)                                         | 117/165                               | 92.8 (22.6) | 265/380                               | 86.7 (20.6) | 0.0103                      | 349/518                               | 78.9 (22.3) | <0.0001                     |
| TLC (%pred) (last visit), mean (SD)                                         | 92/165                                | 98.3 (21.2) | 195/380                               | 88.8 (19.7) | 0.0002                      | 258/518                               | 81.0 (21.0) | <0.0001                     |
| sPAP >40mmHg, echocardiography (ever), n (%)                                | 150/165                               | 17 (11.3%)  | 324/380                               | 74 (22.8%)  | 0.0031                      | 451/518                               | 112 (24.8%) | 0.0005                      |
| Pulmonary hypertension (ever), n (%)                                        | 147/165                               | 31 (21.1%)  | 345/380                               | 111 (32.2%) | 0.0130                      | 480/518                               | 168 (35.0%) | 0.0015                      |
| <i>Immunological findings</i>                                               |                                       |             |                                       |             |                             |                                       |             |                             |
| ANA+ n (%)                                                                  | 164/165                               | 161 (98.2%) | 380/380                               | 374 (98.4%) | 1.0000                      | 515/518                               | 499 (96.9%) | 0.5868                      |
| ACA+ , n (%)                                                                | 162/165                               | 84 (51.9%)  | 369/380                               | 97 (26.3%)  | <0.0001                     | 508/518                               | 66 (13.0%)  | <0.0001                     |
| ATA+ , n (%)                                                                | 163/165                               | 36 (22.1%)  | 376/380                               | 205 (54.5%) | <0.0001                     | 510/518                               | 351 (68.8%) | <0.0001                     |
| RNA pol III+ , n (%)                                                        | 143/165                               | 7 (4.9%)    | 275/380                               | 17 (6.2%)   | 0.5916                      | 400/518                               | 46 (11.5%)  | 0.0224                      |



|                                           |         |            |         |             |        |         |             |         |
|-------------------------------------------|---------|------------|---------|-------------|--------|---------|-------------|---------|
| PmScl+ , n (%)                            | 135/165 | 10 (7.4%)  | 261/380 | 9 (3.4%)    | 0.0806 | 398/518 | 28 (7.0%)   | 0.8845  |
| U1RNP+ , n (%)                            | 154/165 | 8 (5.2%)   | 337/380 | 17 (5.0%)   | 0.9440 | 459/518 | 16 (3.5%)   | 0.3441  |
| CRP >5mg/L (ever), n (%)                  | 156/165 | 19 (12.2%) | 300/380 | 29 (9.7%)   | 0.4068 | 369/518 | 48 (13.0%)  | 0.7948  |
| <i>Therapeutics</i>                       |         |            |         |             |        |         |             |         |
| Immunomodulatory therapies (ever)*, n (%) | 162/165 | 89 (54.9%) | 334/380 | 241 (72.2%) | 0.0001 | 447/518 | 350 (78.3%) | <0.0001 |
| MMF (ever), n (%)                         | 162/165 | 13 (8.0%)  | 334/380 | 42 (12.6%)  | 0.1301 | 447/518 | 67 (15.0%)  | 0.0246  |
| MTX (ever), n (%)                         | 162/165 | 20 (12.3%) | 334/380 | 84 (25.1%)  | 0.0010 | 447/518 | 144 (32.2%) | <0.0001 |
| Corticosteroids (ever), n (%)             | 162/165 | 69 (42.6%) | 334/380 | 158 (47.3%) | 0.3231 | 447/518 | 254 (56.8%) | 0.0019  |
| Cyclophosphamide (ever), n (%)            | 162/165 | 27 (16.7%) | 334/380 | 74 (22.2%)  | 0.1545 | 447/518 | 147 (32.9%) | <0.0001 |
| Calcium channel inhibitors (ever), n (%)  | 162/165 | 90 (55.6%) | 334/380 | 214 (64.1%) | 0.0678 | 447/518 | 320 (71.6%) | 0.0002  |
| Sildenafil (ever), n (%)                  | 162/165 | 14 (8.6%)  | 334/380 | 48 (14.4%)  | 0.0704 | 447/518 | 62 (13.9%)  | 0.0845  |
| Bosentan (ever), n (%)                    | 162/165 | 18 (11.1%) | 334/380 | 65 (19.5%)  | 0.0195 | 447/518 | 145 (32.4%) | <0.0001 |
| Iloprost (ever), n (%)                    | 162/165 | 14 (8.6%)  | 334/380 | 67 (20.1%)  | 0.0013 | 447/518 | 121 (27.1%) | <0.0001 |

ACA: anti-centromere antibodies ; ANA: Antinuclear antibodies ; ATA: anti-topoisomerase I antibodies ; CK: creatinine-phospho-kinase ; CRP: C-reactive Protein ; DLCO: Diffusion capacities of carbon-monoxide ; DU: digital Ulcers ; EScSG: European Systemic Sclerosis research group ; FVC: Forced Vital Capacity ; HRCT: High resolution computed tomography ; ILD: Interstitial lung disease ; MMF: Mycophenolate mofetil ; MTX: Methotrexate ; RNA pol III: anti RNA polymerase III antibodies ; RP: Raynaud's Phenomenon ; SD : standard deviation ; sPAP: systolique Pulmonary Arterial Pressure ; SSc : systemic sclerosis ; ssSSc: Systemic sclerosis sine scleroderma ; TLC: Total Lung capacities ; U1-RNP: Anti U1 ribonuclease protein antibodies

\*= Abatacept, Abatacept (iv or sc), Enbrel, Golimumab, Humira, Infliximab, JAK kinase inhibitors, Rituximab, TNF-alpha antagonist, Tnf alpha antagonist, Tocilizumab, Tocilizumab (iv or sc), Other biologic therapy, Azathioprine, Cyclosporine A, Cyclophosphamide, D-penicillamine, Chloroquine/Hydroxychloroquine, Imatinib, Leflunomide, Methotrexate, Mycophenolate mofetyl, Prednisone, Sulfasalazine

**eTable 4: Clinical characteristics associated with ILD and/or Lung Fibrosis ever (i.e. history of ILD and/or Lung Fibrosis at inclusion and/or ILD and/or Lung Fibrosis during follow-up) in sine scleroderma patients (ssSSc).**

| Characteristics at last visit<br>N=352               | Univariate modeling for ILD and/or Lung Fibrosis (ever) |         | Multivariable modeling for ILD and/or Lung Fibrosis (ever) |         |
|------------------------------------------------------|---------------------------------------------------------|---------|------------------------------------------------------------|---------|
|                                                      | Odds Ratio (95% CI)                                     | P-value | Odds Ratio (95% CI)                                        | P-value |
| Age at last visit (years)                            | 1.037 (1.020, 1.054)                                    | <.0001  | 1.048 (1.009, 1.089)                                       | 0.0148  |
| Gender (ref=Female)                                  | 1.727 (0.797, 3.745)                                    | 0.1664  | 4.801 (0.416, 55.361)                                      | 0.2086  |
| Disease duration since RP onset (years) (last visit) | 1.018 (0.998, 1.038)                                    | 0.0751  | 1.003 (0.968, 1.038)                                       | 0.8847  |
| Raynaud's Phenomenon (ref=Never)                     | 1.018 (0.063, 16.417)                                   | 0.9898  |                                                            |         |
| Telangiectasia (ref=Never)                           | 0.975 (0.618, 1.536)                                    | 0.9117  |                                                            |         |
| Previous or Current (ref=Never)                      | 0.813 (0.505, 1.309)                                    | 0.3946  |                                                            |         |
| Pitting scars (ref=Never)                            | 1.016 (0.640, 1.613)                                    | 0.9477  |                                                            |         |
| Puffy fingers (ref=Never)                            | 1.216 (0.786, 1.881)                                    | 0.3799  |                                                            |         |
| Joint synovitis (ref=Never)                          | 1.355 (0.777, 2.366)                                    | 0.2846  |                                                            |         |
| Tendon friction rubs (ref=Never)                     | 1.331 (0.593, 2.984)                                    | 0.4883  |                                                            |         |
| CK-elevation (ref=Never)                             | 1.851 (0.917, 3.738)                                    | 0.0858  | 4.194 (1.137, 15.471)                                      | 0.0314  |
| Esophageal symptoms (ref=Never)                      | 0.941 (0.581, 1.525)                                    | 0.8056  |                                                            |         |
| Stomach symptoms (ref=Never)                         | 1.022 (0.659, 1.586)                                    | 0.9221  |                                                            |         |
| Intestinal symptoms (ref=Never)                      | 1.404 (0.923, 2.136)                                    | 0.1127  | 2.427 (1.075, 5.478)                                       | 0.0328  |
| History of scleroderma renal crisis (ref=Never)      | 1.199 (0.317, 4.541)                                    | 0.7894  |                                                            |         |
| Proteinuria (ref=Never)                              | 1.277 (0.652, 2.501)                                    | 0.4756  |                                                            |         |
| Significant dyspnea (ref=Never)                      | 3.764 (1.925, 7.357)                                    | 0.0001  | 2.503 (0.711, 8.806)                                       | 0.1529  |
| ppDLCO (last visit)                                  | 0.963 (0.948, 0.979)                                    | <.0001  |                                                            |         |
| ppFVC (last visit)                                   | 0.967 (0.954, 0.980)                                    | <.0001  | 0.964 (0.943, 0.985)                                       | 0.0007  |
| ppTLC (last visit)                                   | 0.980 (0.965, 0.995)                                    | 0.0083  |                                                            |         |
| sPAP >40mmHg (ref=Never)                             | 1.273 (0.630, 2.573)                                    | 0.5019  |                                                            |         |
| Pulmonary hypertension (ref=Never)                   | 2.499 (1.321, 4.730)                                    | 0.0049  | 0.625 (0.189, 2.069)                                       | 0.4417  |
| Left ventricular ejection fraction (last visit)      | 0.965 (0.918, 1.013)                                    | 0.1498  |                                                            |         |
| Diastolic heart dysfunction (ref=Never)              | 1.924 (1.237, 2.991)                                    | 0.0037  | 1.364 (0.553, 3.366)                                       | 0.5006  |
| Conduction block (ref=Never)                         | 2.493 (1.338, 4.645)                                    | 0.0040  | 1.031 (0.350, 3.039)                                       | 0.9556  |
| EScSG disease activity index (2001) (last visit)     | 1.802 (1.272, 2.551)                                    | 0.0009  |                                                            |         |
| EScSG disease activity index (2016) (last visit)     | 1.190 (0.807, 1.754)                                    | 0.3798  |                                                            |         |
| ANA+ (ref=Negative)                                  | 1.767 (0.416, 7.510)                                    | 0.4406  |                                                            |         |
| ACA+ (ref=Negative)                                  | 0.429 (0.275, 0.671)                                    | 0.0002  | 1.581 (0.578, 4.324)                                       | 0.3721  |
| ATA+ (ref=Negative)                                  | 2.318 (1.282, 4.194)                                    | 0.0054  | 3.246 (0.850, 12.390)                                      | 0.0850  |
| RNA (ref=Negative)                                   | 1.182 (0.388, 3.601)                                    | 0.7684  |                                                            |         |
| PmScl+ (ref=Negative)                                | 3.382 (0.911, 12.554)                                   | 0.0686  | >999.999 (<0.001, >999.999)                                | 0.9702  |
| U1RNP+ (ref=Negative)                                | 0.740 (0.284, 1.926)                                    | 0.5374  |                                                            |         |
| CRP >5mg/L (ref=Never)                               | 2.199 (0.932, 5.185)                                    | 0.0718  | 0.940 (0.219, 4.031)                                       | 0.9341  |

ACA: anti-centromere antibodies ; ANA: Antinuclear antibodies ; ATA: anti-topoisomerase I antibodies ; CK: creatinine-phospho-kinase ; CRP: C-reactive Protein ; DLCO: Diffusion capacities of carbon-monoxide ; DU: digital Ulcers ; EScSG: European Systemic Sclerosis research group ; FVC: Forced Vital Capacity ; HRCT: High resolution computed tomography ; ILD: Interstitial lung disease ; MMF: Mycophenolate mofetil ; MTX: Methotrexate ; RNA pol III: anti RNA polymerase III antibodies ; RP: Raynaud's Phenomenon ; SD : standard deviation ; sPAP: systolique Pulmonary Arterial Pressure ; SSc: systemic sclerosis ; ssSSc: Systemic sclerosis sine scleroderma ; TLC: Total Lung capacities ; U1-RNP: Anti U1 ribonuclease protein antibodies
