# Supplementary material
Source: PubMed Central journal article supplement (PMC10308295)
Supplement: jamadermatol-e231729-s002.pdf [file jamadermatol-e231729-s002.pdf]

## Supplemental Online Content: Nonauthor Collaborators

\*First name, last name, and suffix (if applicable) are required and will appear in PubMed.

| *Group Name(s): EUSTAR Collaborators |                    |                       |                  |                                                  |                                          |                                                         |                                                                                            |
|--------------------------------------|--------------------|-----------------------|------------------|--------------------------------------------------|------------------------------------------|---------------------------------------------------------|--------------------------------------------------------------------------------------------|
| *First Name and Middle Initial(s)    | *Last Name         | *Suffix (eg, Jr, III) | Academic Degrees | Institution                                      | Location (city, state/province, country) | Role or Contribution, eg, chair, principal investigator | Group (if more than 1 Group listed in the byline) and/or Subgroup (eg, Steering Committee) |
| Marco                                | Matucci Cerinic    |                       | MD               | Local EUSTAR Center, scleroderma referral center | Florence (Italy)                         | Inclusion of patients                                   |                                                                                            |
| Ulrich                               | Walker             |                       | MD               | Local EUSTAR Center, scleroderma referral center | Basel (Switzerland)                      | Inclusion of patients                                   |                                                                                            |
| Florenzo                             | Iannone            |                       | MD               | Local EUSTAR Center, scleroderma referral center | Bari (Italy)                             | Inclusion of patients                                   |                                                                                            |
| Radim                                | Becvar             |                       | MD               | Local EUSTAR Center, scleroderma referral center | Prague (Czech Republic)                  | Inclusion of patients                                   |                                                                                            |
| Otylia                               | Kowal Bielecka     |                       | MD               | Local EUSTAR Center, scleroderma referral center | Bialystok (Poland)                       | Inclusion of patients                                   |                                                                                            |
| Carmen                               | Pizzorni           |                       | MD               | Local EUSTAR Center, scleroderma referral center | Genova (Italy)                           | Inclusion of patients                                   |                                                                                            |
| Francesco                            | Ciccia             |                       | MD               | Local EUSTAR Center, scleroderma referral center | Naples (Italy)                           | Inclusion of patients                                   |                                                                                            |
| Elise                                | Siegert            |                       | MD               | Local EUSTAR Center, scleroderma referral center | Berlin (Germany)                         | Inclusion of patients                                   |                                                                                            |
| Simona                               | Rednic             |                       | MD               | Local EUSTAR Center, scleroderma referral center | Cluj-Napoca (Romania)                    | Inclusion of patients                                   |                                                                                            |
| Panayiotis G.                        | Vlachoyiannopoulos |                       | MD               | Local EUSTAR Center, scleroderma referral center | Athens (Greece)                          | Inclusion of patients                                   |                                                                                            |
| Jiri                                 | Stork              |                       | MD               | Local EUSTAR Center, scleroderma referral center | Prague (Czech Republic)                  | Inclusion of patients                                   |                                                                                            |
| Murat                                | Inanc              |                       | MD               | Local EUSTAR Center, scleroderma referral center | Capa, Istanbul (Turkey)                  | Inclusion of patients                                   |                                                                                            |
| Patricia E.                          | Carreira           |                       | MD               | Local EUSTAR Center, scleroderma referral center | Madrid (Spain)                           | Inclusion of patients                                   |                                                                                            |
| Srdan                                | Novak              |                       | MD               | Local EUSTAR Center, scleroderma referral center | Rijeka (Croatia)                         | Inclusion of patients                                   |                                                                                            |

## Supplemental Online Content: Nonauthor Collaborators

\*First name, last name, and suffix (if applicable) are required and will appear in PubMed.

| *First Name and Middle Initial(s) | *Last Name       | *Suffix (eg, Jr, III) | Academic Degrees | Institution                                      | Location (city, state/province, country) | Role or Contribution, eg, chair, principal investigator | Group (if more than 1 Group listed in the byline) and/or Subgroup (eg, Steering Committee) |
|-----------------------------------|------------------|-----------------------|------------------|--------------------------------------------------|------------------------------------------|---------------------------------------------------------|--------------------------------------------------------------------------------------------|
| László                            | Czirják          |                       | MD               | Local EUSTAR Center, scleroderma referral center | Pecs (Hungary)                           | Inclusion of patients                                   |                                                                                            |
| Michele                           | Iudici           |                       | MD               | Local EUSTAR Center, scleroderma referral center | Geneva (Switzerland)                     | Inclusion of patients                                   |                                                                                            |
| Eugene J.                         | Kucharz          |                       | MD               | Local EUSTAR Center, scleroderma referral center | Katowice (Poland)                        | Inclusion of patients                                   |                                                                                            |
| Katja                             | Perdan-Pirkmajer |                       | MD               | Local EUSTAR Center, scleroderma referral center | Ljubljana (Slovenia)                     | Inclusion of patients                                   |                                                                                            |
| Bernard                           | Coleiro          |                       | MD               | Local EUSTAR Center, scleroderma referral center | Balzan (Malta)                           | Inclusion of patients                                   |                                                                                            |
| Gianluca                          | Moroncini        |                       | MD               | Local EUSTAR Center, scleroderma referral center | Ancona (Italy)                           | Inclusion of patients                                   |                                                                                            |
| Dominique                         | Farge Bancel     |                       | MD               | Local EUSTAR Center, scleroderma referral center | Paris (France)                           | Inclusion of patients                                   |                                                                                            |
| Roger                             | Hesselstrand     |                       | MD               | Local EUSTAR Center, scleroderma referral center | Lund (Sweden)                            | Inclusion of patients                                   |                                                                                            |
| Mislav                            | Radic            |                       | MD               | Local EUSTAR Center, scleroderma referral center | Split (Croatia)                          | Inclusion of patients                                   |                                                                                            |
| Alexandra                         | Balbir-Gurman    |                       | MD               | Local EUSTAR Center, scleroderma referral center | Haifa (Israel)                           | Inclusion of patients                                   |                                                                                            |
| Andrea                            | Lo Monaco        |                       | MD               | Local EUSTAR Center, scleroderma referral center | Ferrara (Italy)                          | Inclusion of patients                                   |                                                                                            |
| Raffaele                          | Pellerito        |                       | MD               | Local EUSTAR Center, scleroderma referral center | Torino (Italy)                           | Inclusion of patients                                   |                                                                                            |
| Alessandro                        | Giollo           |                       | MD               | Local EUSTAR Center, scleroderma referral center | Verona (Italy)                           | Inclusion of patients                                   |                                                                                            |
| Jadranka                          | Morovic-Vergles  |                       | MD               | Local EUSTAR Center, scleroderma referral center | Zagreb (Croatia)                         | Inclusion of patients                                   |                                                                                            |
| Christopher                       | Denton           |                       | MD               | Local EUSTAR Center, scleroderma referral center | London (United Kingdom)                  | Inclusion of patients                                   |                                                                                            |

## Supplemental Online Content: Nonauthor Collaborators

\*First name, last name, and suffix (if applicable) are required and will appear in PubMed.

| *First Name and Middle Initial(s) | *Last Name       | *Suffix (eg, Jr, III) | Academic Degrees | Institution                                      | Location (city, state/province, country) | Role or Contribution, eg, chair, principal investigator | Group (if more than 1 Group listed in the byline) and/or Subgroup (eg, Steering Committee) |
|-----------------------------------|------------------|-----------------------|------------------|--------------------------------------------------|------------------------------------------|---------------------------------------------------------|--------------------------------------------------------------------------------------------|
| Madelon                           | Vonk             |                       | MD               | Local EUSTAR Center, scleroderma referral center | Nijmegen (The Netherlands)               | Inclusion of patients                                   |                                                                                            |
| Nemanja                           | Damjanov         |                       | MD               | Local EUSTAR Center, scleroderma referral center | Belgrade (Serbia & Montenegro)           | Inclusion of patients                                   |                                                                                            |
| Jörg                              | Henes            |                       | MD               | Local EUSTAR Center, scleroderma referral center | Tübingen (Germany)                       | Inclusion of patients                                   |                                                                                            |
| Vera                              | Ortiz Santamaria |                       | MD               | Local EUSTAR Center, scleroderma referral center | Granollers, Barcelona (Spain)            | Inclusion of patients                                   |                                                                                            |
| Stefan                            | Heitmann         |                       | MD               | Local EUSTAR Center, scleroderma referral center | Stuttgart (Germany)                      | Inclusion of patients                                   |                                                                                            |
| Dorota                            | Krasowska        |                       | MD               | Local EUSTAR Center, scleroderma referral center | Lublin (Poland)                          | Inclusion of patients                                   |                                                                                            |
| Paul                              | Hasler           |                       | MD               | Local EUSTAR Center, scleroderma referral center | Aarau (Switzerland)                      | Inclusion of patients                                   |                                                                                            |
| Michaela                          | Kohm             |                       | MD               | Local EUSTAR Center, scleroderma referral center | Frankfurt am Main (Germany)              | Inclusion of patients                                   |                                                                                            |
| Ivan                              | Foeldvari        |                       | MD               | Local EUSTAR Center, scleroderma referral center | Hamburg (Germany)                        | Inclusion of patients                                   |                                                                                            |
| Gianluigi                         | Bajocchi         |                       | MD               | Local EUSTAR Center, scleroderma referral center | Reggio Emilia (Italy)                    | Inclusion of patients                                   |                                                                                            |
| Maria                             | João Salvador    |                       | MD               | Local EUSTAR Center, scleroderma referral center | Coimbra (Portugal)                       | Inclusion of patients                                   |                                                                                            |
| Bojana                            | Stamenkovic      |                       | MD               | Local EUSTAR Center, scleroderma referral center | Niska Banja (Serbia and Montenegro)      | Inclusion of patients                                   |                                                                                            |
| Carlo F.                          | Selmi            |                       | MD               | Local EUSTAR Center, scleroderma referral center | Rozzano, Milano (Italy)                  | Inclusion of patients                                   |                                                                                            |
| Mohammed                          | Tikly            |                       | MD               | Local EUSTAR Center, scleroderma referral center | Johannesburg (South Africa)              | Inclusion of patients                                   |                                                                                            |
| Lidia P.                          | Ananieva         |                       | MD               | Local EUSTAR Center, scleroderma referral center | Moscow (Russia)                          | Inclusion of patients                                   |                                                                                            |

## Supplemental Online Content: Nonauthor Collaborators

\*First name, last name, and suffix (if applicable) are required and will appear in PubMed.

| *First Name and Middle Initial(s) | *Last Name    | *Suffix (eg, Jr, III) | Academic Degrees | Institution                                      | Location (city, state/province, country) | Role or Contribution, eg, chair, principal investigator | Group (if more than 1 Group listed in the byline) and/or Subgroup (eg, Steering Committee) |
|-----------------------------------|---------------|-----------------------|------------------|--------------------------------------------------|------------------------------------------|---------------------------------------------------------|--------------------------------------------------------------------------------------------|
| Ariane                            | Herrick       |                       | MD               | Local EUSTAR Center, scleroderma referral center | Salford (United Kingdom)                 | Inclusion of patients                                   |                                                                                            |
| Ulf                               | Müller-Ladner |                       | MD               | Local EUSTAR Center, scleroderma referral center | Bad Nauheim (Germany)                    | Inclusion of patients                                   |                                                                                            |
| Klaus                             | Søndergaard   |                       | MD               | Local EUSTAR Center, scleroderma referral center | Aarhus N (Denmark)                       | Inclusion of patients                                   |                                                                                            |
| Francesco                         | Puppo         |                       | MD               | Local EUSTAR Center, scleroderma referral center | Genova (Italy)                           | Inclusion of patients                                   |                                                                                            |
| Merete                            | Engelhart     |                       | MD               | Local EUSTAR Center, scleroderma referral center | Hellerup (Denmark)                       | Inclusion of patients                                   |                                                                                            |
| Gabriela                          | Szücs         |                       | MD               | Local EUSTAR Center, scleroderma referral center | Debrecen (Hungary)                       | Inclusion of patients                                   |                                                                                            |
| Carlos                            | de la Puente  |                       | MD               | Local EUSTAR Center, scleroderma referral center | Madrid (Spain)                           | Inclusion of patients                                   |                                                                                            |
| Valeria                           | Ricciari      |                       | MD               | Local EUSTAR Center, scleroderma referral center | Roma (Italy)                             | Inclusion of patients                                   |                                                                                            |
| Ruxandra Maria                    | Ionescu       |                       | MD               | Local EUSTAR Center, scleroderma referral center | Bucharest (Romania)                      | Inclusion of patients                                   |                                                                                            |
| Ami                               | Sha           |                       | MD               | Local EUSTAR Center, scleroderma referral center | Baltimore (USA)                          | Inclusion of patients                                   |                                                                                            |
| Ana Maria                         | Gheorghiu     |                       | MD               | Local EUSTAR Center, scleroderma referral center | Bucharest (Romania)                      | Inclusion of patients                                   |                                                                                            |
| Cord                              | Sunderkötter  |                       | MD               | Local EUSTAR Center, scleroderma referral center | Münster (Germany)                        | Inclusion of patients                                   |                                                                                            |
| Jörg                              | Distler       |                       | MD               | Local EUSTAR Center, scleroderma referral center | Erlangen (Germany)                       | Inclusion of patients                                   |                                                                                            |
| Francesca                         | Ingegnoli     |                       | MD               | Local EUSTAR Center, scleroderma referral center | Milano (Italy)                           | Inclusion of patients                                   |                                                                                            |
| Luc                               | Mouthon       |                       | MD               | Local EUSTAR Center, scleroderma referral center | Paris (France)                           | Inclusion of patients                                   |                                                                                            |

Supplemental Online Content: Nonauthor Collaborators

\*First name, last name, and suffix (if applicable) are required and will appear in PubMed.

| *First Name and Middle Initial(s) | *Last Name      | *Suffix (eg, Jr, III) | Academic Degrees | Institution                                      | Location (city, state/province, country) | Role or Contribution, eg, chair, principal investigator | Group (if more than 1 Group listed in the byline) and/or Subgroup (eg, Steering Committee) |
|-----------------------------------|-----------------|-----------------------|------------------|--------------------------------------------------|------------------------------------------|---------------------------------------------------------|--------------------------------------------------------------------------------------------|
| Vanessa                           | Smith           |                       | MD               | Local EUSTAR Center, scleroderma referral center | Ghent (Belgium)                          | Inclusion of patients                                   |                                                                                            |
| Francesco                         | Paolo Cantatore |                       | MD               | Local EUSTAR Center, scleroderma referral center | Foggia (Italy)                           | Inclusion of patients                                   |                                                                                            |
| Susanne                           | Ullman          |                       | MD               | Local EUSTAR Center, scleroderma referral center | Copenhagen (Denmark)                     | Inclusion of patients                                   |                                                                                            |
| Carlos Alberto                    | von Mühlen      |                       | MD               | Local EUSTAR Center, scleroderma referral center | Porto Alegre (Brazil)                    | Inclusion of patients                                   |                                                                                            |
| Maria Rosa                        | Pozzi           |                       | MD               | Local EUSTAR Center, scleroderma referral center | Monza (Italy)                            | Inclusion of patients                                   |                                                                                            |
| Kilian                            | Eyerich         |                       | MD               | Local EUSTAR Center, scleroderma referral center | Munich (Germany)                         | Inclusion of patients                                   |                                                                                            |
| Piotr                             | Wiland          |                       | MD               | Local EUSTAR Center, scleroderma referral center | Wroclaw (Poland)                         | Inclusion of patients                                   |                                                                                            |
| Marie                             | Vanthuyne       |                       | MD               | Local EUSTAR Center, scleroderma referral center | Brussels (Belgium)                       | Inclusion of patients                                   |                                                                                            |
| Juan Jose                         | Alegre-Sancho   |                       | MD               | Local EUSTAR Center, scleroderma referral center | Valencia (Spain)                         | Inclusion of patients                                   |                                                                                            |
| Kristine                          | Herrmann        |                       | MD               | Local EUSTAR Center, scleroderma referral center | Dresden (Germany)                        | Inclusion of patients                                   |                                                                                            |
| Ellen                             | De Langhe       |                       |                  | Local EUSTAR Center, scleroderma referral center | Leuven (Belgium)                         | Inclusion of patients                                   |                                                                                            |
| Branimir                          | Anic            |                       |                  | Local EUSTAR Center, scleroderma referral center | Zagreb (Croatia)                         | Inclusion of patients                                   |                                                                                            |
| Marko                             | Baresic         |                       |                  | Local EUSTAR Center, scleroderma referral center | Zagreb (Croatia)                         | Inclusion of patients                                   |                                                                                            |
| Miroslav                          | Mayer           |                       |                  | Local EUSTAR Center, scleroderma referral center | Zagreb (Croatia)                         | Inclusion of patients                                   |                                                                                            |
| Maria                             | Üprus           |                       |                  | Local EUSTAR Center, scleroderma referral center | Tallin (Estonia)                         | Inclusion of patients                                   |                                                                                            |

Supplemental Online Content: Nonauthor Collaborators

\*First name, last name, and suffix (if applicable) are required and will appear in PubMed.

| *First Name and Middle Initial(s) | *Last Name      | *Suffix (eg, Jr, III) | Academic Degrees | Institution                                      | Location (city, state/province, country) | Role or Contribution, eg, chair, principal investigator | Group (if more than 1 Group listed in the byline) and/or Subgroup (eg, Steering Committee) |
|-----------------------------------|-----------------|-----------------------|------------------|--------------------------------------------------|------------------------------------------|---------------------------------------------------------|--------------------------------------------------------------------------------------------|
| Kati                              | Otsa            |                       |                  | Local EUSTAR Center, scleroderma referral center | Tallin (Estonia)                         | Inclusion of patients                                   |                                                                                            |
| Sule                              | Yavuz           |                       |                  | Local EUSTAR Center, scleroderma referral center | Altunizade-Istanbul (Turkey)             | Inclusion of patients                                   |                                                                                            |
| Brigitte                          | Granel          |                       |                  | Local EUSTAR Center, scleroderma referral center | Marseille (France)                       | Inclusion of patients                                   |                                                                                            |
| Carolina                          | de Souza Müller |                       |                  | Local EUSTAR Center, scleroderma referral center | Curitiba (Brazil)                        | Inclusion of patients                                   |                                                                                            |
| Svetlana                          | Agachi          |                       |                  | Local EUSTAR Center, scleroderma referral center | Chisinau (Republic of Moldova)           | Inclusion of patients                                   |                                                                                            |
| Simon                             | Stebbing        |                       |                  | Local EUSTAR Center, scleroderma referral center | Dunedin (New Zealand)                    | Inclusion of patients                                   |                                                                                            |
| Alessandro                        | Mathieu         |                       |                  | Local EUSTAR Center, scleroderma referral center | Monserato (CA) (Italy)                   | Inclusion of patients                                   |                                                                                            |
| Alessandra                        | Vacca           |                       |                  | Local EUSTAR Center, scleroderma referral center | Monserato (CA) (Italy)                   | Inclusion of patients                                   |                                                                                            |
| Percival D.                       | Sampaio-Barros  |                       |                  | Local EUSTAR Center, scleroderma referral center | São Paulo (Brazil)                       | Inclusion of patients                                   |                                                                                            |
| Lisa                              | Stamp           |                       |                  | Local EUSTAR Center, scleroderma referral center | Christchurch (New Zealand)               | Inclusion of patients                                   |                                                                                            |
| Kamal                             | Solanki         |                       |                  | Local EUSTAR Center, scleroderma referral center | Hamilton (New Zealand)                   | Inclusion of patients                                   |                                                                                            |
| Douglas                           | Veale           |                       |                  | Local EUSTAR Center, scleroderma referral center | Dublin (Ireland)                         | Inclusion of patients                                   |                                                                                            |
| Esthela                           | Loyo            |                       |                  | Local EUSTAR Center, scleroderma referral center | Santiago (Dominican Republic)            | Inclusion of patients                                   |                                                                                            |
| Carmen                            | Tineo           |                       |                  | Local EUSTAR Center, scleroderma referral center |                                          | Inclusion of patients                                   |                                                                                            |
| Sergio                            | Tolozá          |                       |                  | Local EUSTAR Center, scleroderma referral center | Catamarca (Argentina)                    | Inclusion of patients                                   |                                                                                            |

## Supplemental Online Content: Nonauthor Collaborators

\*First name, last name, and suffix (if applicable) are required and will appear in PubMed.

| *First Name and Middle Initial(s) | *Last Name          | *Suffix (eg, Jr, III) | Academic Degrees | Institution                                      | Location (city, state/province, country) | Role or Contribution, eg, chair, principal investigator | Group (if more than 1 Group listed in the byline) and/or Subgroup (eg, Steering Committee) |
|-----------------------------------|---------------------|-----------------------|------------------|--------------------------------------------------|------------------------------------------|---------------------------------------------------------|--------------------------------------------------------------------------------------------|
| Mengtao                           | Li                  |                       |                  | Local EUSTAR Center, scleroderma referral center | Beijing (China)                          | Inclusion of patients                                   |                                                                                            |
| Walid Ahmed Abdel Atty            | Mohamed             |                       |                  | Local EUSTAR Center, scleroderma referral center | Alexandria (Egypt)                       | Inclusion of patients                                   |                                                                                            |
| Jacek                             | Olas                |                       |                  | Local EUSTAR Center, scleroderma referral center | Crakow (Poland)                          | Inclusion of patients                                   |                                                                                            |
| Fahrettin                         | Oksel               |                       |                  | Local EUSTAR Center, scleroderma referral center | Bornova, Izmir (Turkey)                  | Inclusion of patients                                   |                                                                                            |
| Figen                             | Yargucu             |                       |                  | Local EUSTAR Center, scleroderma referral center | Bornova, Izmir (Turkey)                  | Inclusion of patients                                   |                                                                                            |
| Cristina-Mihaela                  | Tanaseanu           |                       |                  | Local EUSTAR Center, scleroderma referral center | Bucharest (Romania)                      | Inclusion of patients                                   |                                                                                            |
| Rosario                           | Foti                |                       |                  | Local EUSTAR Center, scleroderma referral center | Catania (Italy)                          | Inclusion of patients                                   |                                                                                            |
| Codrina                           | Ancuta              |                       |                  | Local EUSTAR Center, scleroderma referral center | Iasi (Romania)                           | Inclusion of patients                                   |                                                                                            |
| Daniel E.                         | Furst               |                       |                  | Local EUSTAR Center, scleroderma referral center | Los Angeles (USA)                        | Inclusion of patients                                   |                                                                                            |
| Britta                            | Maurer              |                       |                  | Local EUSTAR Center, scleroderma referral center | Bern (Switzerland)                       | Inclusion of patients                                   |                                                                                            |
| Jacob                             | van Laar            |                       |                  | Local EUSTAR Center, scleroderma referral center | Middlesbrough (United Kingdom)           | Inclusion of patients                                   |                                                                                            |
| Marzena                           | Olesinska           |                       |                  | Local EUSTAR Center, scleroderma referral center | Warsaw (Poland)                          | Inclusion of patients                                   |                                                                                            |
| Cristiane                         | Kayser              |                       |                  | Local EUSTAR Center, scleroderma referral center | São Paulo (Brazil)                       | Inclusion of patients                                   |                                                                                            |
| Nihal                             | Fathi               |                       |                  | Local EUSTAR Center, scleroderma referral center | Assiut (Egypt)                           | Inclusion of patients                                   |                                                                                            |
| Paloma García                     | de la Peña Lefebvre |                       |                  | Local EUSTAR Center, scleroderma referral center | Madrid (Spain)                           | Inclusion of patients                                   |                                                                                            |

Supplemental Online Content: Nonauthor Collaborators

\*First name, last name, and suffix (if applicable) are required and will appear in PubMed.

| *First Name and Middle Initial(s) | *Last Name | *Suffix (eg, Jr, III) | Academic Degrees | Institution                                      | Location (city, state/province, country) | Role or Contribution, eg, chair, principal investigator | Group (if more than 1 Group listed in the byline) and/or Subgroup (eg, Steering Committee) |
|-----------------------------------|------------|-----------------------|------------------|--------------------------------------------------|------------------------------------------|---------------------------------------------------------|--------------------------------------------------------------------------------------------|
| Jorge Juan Gonzalez               | Martin     |                       |                  | Local EUSTAR Center, scleroderma referral center | Madrid (Spain)                           | Inclusion of patients                                   |                                                                                            |
| Patrick                           | Carpentier |                       |                  | Local EUSTAR Center, scleroderma referral center | Grenoble (France)                        | Inclusion of patients                                   |                                                                                            |
| Bernard                           | Imbert     |                       |                  | Local EUSTAR Center, scleroderma referral center | Grenoble (France)                        | Inclusion of patients                                   |                                                                                            |
| Camille                           | Francès    |                       |                  | Local EUSTAR Center, scleroderma referral center | Paris (France)                           | Inclusion of patients                                   |                                                                                            |
| Patricia                          | Senet      |                       |                  | Local EUSTAR Center, scleroderma referral center | Paris (France)                           | Inclusion of patients                                   |                                                                                            |
| Jean                              | Sibilia    |                       |                  | Local EUSTAR Center, scleroderma referral center | Strasbourg (France)                      | Inclusion of patients                                   |                                                                                            |
| Ira                               | Litinsky   |                       |                  | Local EUSTAR Center, scleroderma referral center | Tel Aviv (Israel)                        | Inclusion of patients                                   |                                                                                            |
| Jean Luc                          | Senécal    |                       |                  | Local EUSTAR Center, scleroderma referral center | Montréal (Canada)                        | Inclusion of patients                                   |                                                                                            |
| Martial                           | Koenig     |                       |                  | Local EUSTAR Center, scleroderma referral center | Montréal (Canada)                        | Inclusion of patients                                   |                                                                                            |
| France                            | Joval      |                       |                  | Local EUSTAR Center, scleroderma referral center | Montréal (Canada)                        | Inclusion of patients                                   |                                                                                            |
| Grodzicky                         | Tamara     |                       |                  | Local EUSTAR Center, scleroderma referral center | Montréal (Canada)                        | Inclusion of patients                                   |                                                                                            |
| Francesco                         | Del Galdo  |                       |                  | Local EUSTAR Center, scleroderma referral center | Leeds (United Kingdom)                   | Inclusion of patients                                   |                                                                                            |
| Goda                              | Seskute    |                       |                  | Local EUSTAR Center, scleroderma referral center | Vilnius (Lithuania)                      | Inclusion of patients                                   |                                                                                            |
| Lesley Ann                        | Saketkoo   |                       |                  | Local EUSTAR Center, scleroderma referral center | New Orleans (USA)                        | Inclusion of patients                                   |                                                                                            |
| Eduardo                           | Kerzberg   |                       |                  | Local EUSTAR Center, scleroderma referral center | Buenos Aires (Argentina)                 | Inclusion of patients                                   |                                                                                            |



Supplemental Online Content: Nonauthor Collaborators

\*First name, last name, and suffix (if applicable) are required and will appear in PubMed.

| *First Name and Middle Initial(s) | *Last Name           | *Suffix (eg, Jr, III) | Academic Degrees | Institution                                      | Location (city, state/province, country) | Role or Contribution, eg, chair, principal investigator | Group (if more than 1 Group listed in the byline) and/or Subgroup (eg, Steering Committee) |
|-----------------------------------|----------------------|-----------------------|------------------|--------------------------------------------------|------------------------------------------|---------------------------------------------------------|--------------------------------------------------------------------------------------------|
| Washington                        | Bianchi              |                       |                  | Local EUSTAR Center, scleroderma referral center | Rio de Janeiro (Brasil)                  | Inclusion of patients                                   |                                                                                            |
| Breno                             | Valdetaro<br>Bianchi |                       |                  | Local EUSTAR Center, scleroderma referral center | Rio de Janeiro (Brasil)                  | Inclusion of patients                                   |                                                                                            |
| Ivan                              | Castellví            |                       |                  | Local EUSTAR Center, scleroderma referral center | Barcelona (Spain)                        | Inclusion of patients                                   |                                                                                            |
| Jasminka                          | Milas-Ahic           |                       |                  | Local EUSTAR Center, scleroderma referral center | Osijek (Croatia)                         | Inclusion of patients                                   |                                                                                            |
| Roberta                           | Visevic              |                       |                  | Local EUSTAR Center, scleroderma referral center | Osijek (Croatia)                         | Inclusion of patients                                   |                                                                                            |
| Massimiliano                      | Limonta              |                       |                  | Local EUSTAR Center, scleroderma referral center | Bergamo (Italy)                          | Inclusion of patients                                   |                                                                                            |
| Doron                             | Rimar                |                       |                  | Local EUSTAR Center, scleroderma referral center | Haifa (Israel)                           | Inclusion of patients                                   |                                                                                            |
| Maura                             | Couto                |                       |                  | Local EUSTAR Center, scleroderma referral center | Viseu (Portugal)                         | Inclusion of patients                                   |                                                                                            |
| François                          | Spertini             |                       |                  | Local EUSTAR Center, scleroderma referral center | Lausanne (Switzerland)                   | Inclusion of patients                                   |                                                                                            |
| Antonella                         | Marcoccia            |                       |                  | Local EUSTAR Center, scleroderma referral center | Roma (Italy)                             | Inclusion of patients                                   |                                                                                            |
| Sarah                             | Kahl                 |                       |                  | Local EUSTAR Center, scleroderma referral center | Bad Bramstedt (Germany)                  | Inclusion of patients                                   |                                                                                            |
| Vivien M.                         | Hsu                  |                       |                  | Local EUSTAR Center, scleroderma referral center | New Brunswick (USA)                      | Inclusion of patients                                   |                                                                                            |
| Thierry                           | Martin               |                       |                  | Local EUSTAR Center, scleroderma referral center | Strasbourg (France)                      | Inclusion of patients                                   |                                                                                            |
| Sergey                            | Moiseev              |                       |                  | Local EUSTAR Center, scleroderma referral center | Moscow (Russia)                          | Inclusion of patients                                   |                                                                                            |
| Pavel                             | Novikov              |                       |                  | Local EUSTAR Center, scleroderma referral center | Moscow (Russia)                          | Inclusion of patients                                   |                                                                                            |

## Supplemental Online Content: Nonauthor Collaborators

\*First name, last name, and suffix (if applicable) are required and will appear in PubMed.

| *First Name and Middle Initial(s) | *Last Name      | *Suffix (eg, Jr, III) | Academic Degrees | Institution                                      | Location (city, state/province, country) | Role or Contribution, eg, chair, principal investigator | Group (if more than 1 Group listed in the byline) and/or Subgroup (eg, Steering Committee) |
|-----------------------------------|-----------------|-----------------------|------------------|--------------------------------------------------|------------------------------------------|---------------------------------------------------------|--------------------------------------------------------------------------------------------|
| Lorinda S.                        | Chung           |                       |                  | Local EUSTAR Center, scleroderma referral center | Stanford (USA)                           | Inclusion of patients                                   |                                                                                            |
| Tim                               | Schmeiser       |                       |                  | Local EUSTAR Center, scleroderma referral center | Wuppertal-Elberfeld (Germany)            | Inclusion of patients                                   |                                                                                            |
| Dominik                           | Majewski        |                       |                  | Local EUSTAR Center, scleroderma referral center | Poznan (Poland)                          | Inclusion of patients                                   |                                                                                            |
| Zbigniew                          | Zdrojewski      |                       |                  | Local EUSTAR Center, scleroderma referral center | Gdansk (Poland)                          | Inclusion of patients                                   |                                                                                            |
| Julia                             | Martínez-Barrio |                       |                  | Local EUSTAR Center, scleroderma referral center | Madrid (Spain)                           | Inclusion of patients                                   |                                                                                            |
| Dinesh                            | Khanna          |                       |                  | Local EUSTAR Center, scleroderma referral center | Ann Arbor, Michigan (USA)                | Inclusion of patients                                   |                                                                                            |
| Vera                              | Bernardino      |                       |                  | Local EUSTAR Center, scleroderma referral center | Lisboa (Portugal)                        | Inclusion of patients                                   |                                                                                            |
| Lelita                            | Santo           |                       |                  | Local EUSTAR Center, scleroderma referral center | Coimbra (Portugal)                       | Inclusion of patients                                   |                                                                                            |
| Yair                              | Levy            |                       |                  | Local EUSTAR Center, scleroderma referral center | Kfar Saba (Israel)                       | Inclusion of patients                                   |                                                                                            |
| Elena                             | Rezus           |                       |                  | Local EUSTAR Center, scleroderma referral center | Lasi (Romania)                           | Inclusion of patients                                   |                                                                                            |
| Omer                              | Nuri Pamuk      |                       |                  | Local EUSTAR Center, scleroderma referral center | Edirne (Turkey)                          | Inclusion of patients                                   |                                                                                            |
| Daniel                            | Brito de Araujo |                       |                  | Local EUSTAR Center, scleroderma referral center | Pelotas, RS (Brasil)                     | Inclusion of patients                                   |                                                                                            |
| Piercarlo                         | Sarzi Puttini   |                       |                  | Local EUSTAR Center, scleroderma referral center | Milano (Italy)                           | Inclusion of patients                                   |                                                                                            |
| Marek                             | Brzosko         |                       |                  | Local EUSTAR Center, scleroderma referral center | Szczecin (Poland)                        | Inclusion of patients                                   |                                                                                            |
| Hadi                              | Poormoghim      |                       |                  | Local EUSTAR Center, scleroderma referral center | Tehran (Iran)                            | Inclusion of patients                                   |                                                                                            |

Supplemental Online Content: Nonauthor Collaborators

\*First name, last name, and suffix (if applicable) are required and will appear in PubMed.

| *First Name and Middle Initial(s) | *Last Name | *Suffix (eg, Jr, III) | Academic Degrees | Institution                                      | Location (city, state/province, country) | Role or Contribution, eg, chair, principal investigator | Group (if more than 1 Group listed in the byline) and/or Subgroup (eg, Steering Committee) |
|-----------------------------------|------------|-----------------------|------------------|--------------------------------------------------|------------------------------------------|---------------------------------------------------------|--------------------------------------------------------------------------------------------|
| Marta                             | Maman      |                       |                  | Local EUSTAR Center, scleroderma referral center | Buenos Aires (Argentina)                 | Inclusion of patients                                   |                                                                                            |
| Ina                               | Kötter     |                       |                  | Local EUSTAR Center, scleroderma referral center | Hamburg (Germany)                        | Inclusion of patients                                   |                                                                                            |
| Giovanna                          | Cuomo      |                       |                  | Local EUSTAR Center, scleroderma referral center | Naples (Italy)                           | Inclusion of patients                                   |                                                                                            |
| Francis                           | Gaches     |                       |                  | Local EUSTAR Center, scleroderma referral center | Toulouse (France)                        | Inclusion of patients                                   |                                                                                            |
| Laura                             | Belloli    |                       |                  | Local EUSTAR Center, scleroderma referral center | Milano (Italy)                           | Inclusion of patients                                   |                                                                                            |
| Petros                            | Sfikakis   |                       |                  | Local EUSTAR Center, scleroderma referral center | Athens (Greece)                          | Inclusion of patients                                   |                                                                                            |
| Juliana                           | Markus     |                       |                  | Local EUSTAR Center, scleroderma referral center | Uberlandia (Brazil)                      | Inclusion of patients                                   |                                                                                            |
| Daniel                            | Furst      |                       |                  | Local EUSTAR Center, scleroderma referral center | Los Angeles (USA)                        | Inclusion of patients                                   |                                                                                            |
| Ana-Maria                         | Ramazan    |                       |                  | Local EUSTAR Center, scleroderma referral center | Constanta City (Romania)                 | Inclusion of patients                                   |                                                                                            |
| Marie-Elise                       | Truchetet  |                       |                  | Local EUSTAR Center, scleroderma referral center | Bordeaux (France)                        | Inclusion of patients                                   |                                                                                            |
| Patrick                           | Jego       |                       |                  | Local EUSTAR Center, scleroderma referral center | Rennes (France)                          | Inclusion of patients                                   |                                                                                            |
| Lorenzo                           | Dagna      |                       |                  | Local EUSTAR Center, scleroderma referral center | Milano (Italy)                           | Inclusion of patients                                   |                                                                                            |
| Jacob M.                          | van Laar   |                       |                  | Local EUSTAR Center, scleroderma referral center | Utrecht (The Netherlands)                | Inclusion of patients                                   |                                                                                            |
| Lidia                             | Voigt      |                       |                  | Local EUSTAR Center, scleroderma referral center | Warsaw (Poland)                          | Inclusion of patients                                   |                                                                                            |
| Susana                            | Oliveira   |                       |                  | Local EUSTAR Center, scleroderma referral center | Amadora (Portugal)                       | Inclusion of patients                                   |                                                                                            |

## Supplemental Online Content: Nonauthor Collaborators

\*First name, last name, and suffix (if applicable) are required and will appear in PubMed.

| *First Name and Middle Initial(s) | *Last Name        | *Suffix (eg, Jr, III) | Academic Degrees | Institution                                      | Location (city, state/province, country) | Role or Contribution, eg, chair, principal investigator | Group (if more than 1 Group listed in the byline) and/or Subgroup (eg, Steering Committee) |
|-----------------------------------|-------------------|-----------------------|------------------|--------------------------------------------------|------------------------------------------|---------------------------------------------------------|--------------------------------------------------------------------------------------------|
| Fabiola                           | Atzeni            |                       |                  | Local EUSTAR Center, scleroderma referral center | Messina (Italy)                          | Inclusion of patients                                   |                                                                                            |
| Masataka                          | Kuwana            |                       |                  | Local EUSTAR Center, scleroderma referral center | Tokyo (Japan)                            | Inclusion of patients                                   |                                                                                            |
| Arsene                            | Mekinian          |                       |                  | Local EUSTAR Center, scleroderma referral center | Paris (France)                           | Inclusion of patients                                   |                                                                                            |
| Mickaël                           | Martin            |                       |                  | Local EUSTAR Center, scleroderma referral center | Poitiers (France)                        | Inclusion of patients                                   |                                                                                            |
| Yoshiya                           | Tanaka            |                       |                  | Local EUSTAR Center, scleroderma referral center | Kitakyushu (Japan)                       | Inclusion of patients                                   |                                                                                            |
| Hidekata                          | Yasuoka           |                       |                  | Local EUSTAR Center, scleroderma referral center | Aichi (Japan)                            | Inclusion of patients                                   |                                                                                            |
| Carmen-Pilar                      | Simeón-Aznar      |                       |                  | Local EUSTAR Center, scleroderma referral center | Barcelona (Spain)                        | Inclusion of patients                                   |                                                                                            |
| Tatsuya                           | Atsumi            |                       |                  | Local EUSTAR Center, scleroderma referral center | Sapporo (Japan)                          | Inclusion of patients                                   |                                                                                            |
| Magda                             | Parvu             |                       |                  | Local EUSTAR Center, scleroderma referral center | Bucharest (Romania)                      | Inclusion of patients                                   |                                                                                            |
| Ines                              | Cordeiro          |                       |                  | Local EUSTAR Center, scleroderma referral center | Lisboa (Portugal)                        | Inclusion of patients                                   |                                                                                            |
| Nicoletta                         | Del Papa          |                       |                  | Local EUSTAR Center, scleroderma referral center | Milano (Italy)                           | Inclusion of patients                                   |                                                                                            |
| Thomas                            | Karonitsch        |                       |                  | Local EUSTAR Center, scleroderma referral center | Vienna (Austria)                         | Inclusion of patients                                   |                                                                                            |
| Anna                              | Bazela-Ostromecka |                       |                  | Local EUSTAR Center, scleroderma referral center | Grunwaldzka (Poland)                     | Inclusion of patients                                   |                                                                                            |
| Enrico                            | Selvi             |                       |                  | Local EUSTAR Center, scleroderma referral center | Siena (Italy)                            | Inclusion of patients                                   |                                                                                            |
| Yasushi                           | Kawaguchi         |                       |                  | Local EUSTAR Center, scleroderma referral center | Tokyo (Japan)                            | Inclusion of patients                                   |                                                                                            |

## Supplemental Online Content: Nonauthor Collaborators

\*First name, last name, and suffix (if applicable) are required and will appear in PubMed.

| *First Name and Middle Initial(s) | *Last Name        | *Suffix (eg, Jr, III) | Academic Degrees | Institution                                      | Location (city, state/province, country) | Role or Contribution, eg, chair, principal investigator | Group (if more than 1 Group listed in the byline) and/or Subgroup (eg, Steering Committee) |
|-----------------------------------|-------------------|-----------------------|------------------|--------------------------------------------------|------------------------------------------|---------------------------------------------------------|--------------------------------------------------------------------------------------------|
| Tomas                             | Soukup            |                       |                  | Local EUSTAR Center, scleroderma referral center | Hradec Kralove (Czech Republic)          | Inclusion of patients                                   |                                                                                            |
| Ignasi                            | Rodriguez-Pinto   |                       |                  | Local EUSTAR Center, scleroderma referral center | Barcelona (Spain)                        | Inclusion of patients                                   |                                                                                            |
| Marija                            | Geroldinger-Simic |                       |                  | Local EUSTAR Center, scleroderma referral center | Linz (Austria)                           | Inclusion of patients                                   |                                                                                            |
| Gerard                            | Espinosa          |                       |                  | Local EUSTAR Center, scleroderma referral center | Barcelona (Spain)                        | Inclusion of patients                                   |                                                                                            |
| Karen                             | Voigt             |                       |                  | Local EUSTAR Center, scleroderma referral center | Hamburg (Germany)                        | Inclusion of patients                                   |                                                                                            |
| Torsten                           | Kubacki           |                       |                  | Local EUSTAR Center, scleroderma referral center | Köln (Germany)                           | Inclusion of patients                                   |                                                                                            |
| Olena                             | Garmish           |                       |                  | Local EUSTAR Center, scleroderma referral center | Kiev (Ukraine)                           | Inclusion of patients                                   |                                                                                            |
| Marta                             | Mosca             |                       |                  | Local EUSTAR Center, scleroderma referral center | Pisa (Italy)                             | Inclusion of patients                                   |                                                                                            |
| Ulrich                            | Gerth             |                       |                  | Local EUSTAR Center, scleroderma referral center | Rheinfelden (Switzerland)                | Inclusion of patients                                   |                                                                                            |
| Ludmila                           | Antonenko         |                       |                  | Local EUSTAR Center, scleroderma referral center | Kiev (Ukraine)                           | Inclusion of patients                                   |                                                                                            |
| Fabian A.                         | Mendoza           |                       |                  | Local EUSTAR Center, scleroderma referral center | Philadelphia (USA)                       | Inclusion of patients                                   |                                                                                            |
| Paolo                             | Airò              |                       |                  | Local EUSTAR Center, scleroderma referral center | Brescia (Italy)                          | Inclusion of patients                                   |                                                                                            |
| Jeska                             | de Vries-Bouwstra |                       |                  | Local EUSTAR Center, scleroderma referral center | Leiden (Netherlands)                     | Inclusion of patients                                   |                                                                                            |
| Gabriela                          | Riemekasten       |                       |                  | Local EUSTAR Center, scleroderma referral center | Lübeck (Germany)                         | Inclusion of patients                                   |                                                                                            |
| Eric                              | Hachulla          |                       |                  | Local EUSTAR Center, scleroderma referral center | Lille (France)                           | Inclusion of patients                                   |                                                                                            |

Supplemental Online Content: Nonauthor Collaborators

\*First name, last name, and suffix (if applicable) are required and will appear in PubMed.

| *First Name and Middle Initial(s) | *Last Name    | *Suffix (eg, Jr, III) | Academic Degrees | Institution                                      | Location (city, state/province, country) | Role or Contribution, eg, chair, principal investigator | Group (if more than 1 Group listed in the byline) and/or Subgroup (eg, Steering Committee) |
|-----------------------------------|---------------|-----------------------|------------------|--------------------------------------------------|------------------------------------------|---------------------------------------------------------|--------------------------------------------------------------------------------------------|
| Andrea                            | Doria         |                       |                  | Local EUSTAR Center, scleroderma referral center | Padova (Italy)                           | Inclusion of patients                                   |                                                                                            |
| Edoardo                           | Rosato        |                       |                  | Local EUSTAR Center, scleroderma referral center | Rome (Italy)                             | Inclusion of patients                                   |                                                                                            |
| Nicolas                           | Hunzelmann    |                       |                  | Local EUSTAR Center, scleroderma referral center | Nordrhein-Westfalen (Germany)            | Inclusion of patients                                   |                                                                                            |
| Carlomaurizio                     | Montecucco    |                       |                  | Local EUSTAR Center, scleroderma referral center | Pavia (Italy)                            | Inclusion of patients                                   |                                                                                            |
| Armando                           | Gabrielli     |                       |                  | Local EUSTAR Center, scleroderma referral center | Ancona (Italy)                           | Inclusion of patients                                   |                                                                                            |
| Anna-Maria                        | Hoffmann-Vold |                       |                  | Local EUSTAR Center, scleroderma referral center | Oslo (Norway)                            | Inclusion of patients                                   |                                                                                            |
| Oliver                            | Distler       |                       |                  | Local EUSTAR Center, scleroderma referral center | Zurich (Switzerland)                     | Inclusion of patients                                   |                                                                                            |
| Jennifer                          | Ben Shimol    |                       |                  | Local EUSTAR Center, scleroderma referral center | Holon (Israel)                           | Inclusion of patients                                   |                                                                                            |
| Maurizio                          | Cutolo        |                       |                  | Local EUSTAR Center, scleroderma referral center | Genoa (Italy)                            | Inclusion of patients                                   |                                                                                            |
| Yannick                           | Allanore      |                       |                  | Local EUSTAR Center, scleroderma referral center | Paris (France)                           | Inclusion of patients                                   |                                                                                            |
