# Supplementary material
Source: PubMed Central journal article supplement (PMC10308295)
Supplement: jamadermatol-e231729-s003.pdf [file jamadermatol-e231729-s003.pdf]

## Data Sharing Statement

Lescoat. Cutaneous Manifestations, Clinical Characteristics, and Prognosis of Patients With Systemic Sclerosis Sine Scleroderma. *JAMA Dermatol*. Published June 28, 2023.

doi:10.1001/jamadermatol.2023.1729

### Data

**Data available:** Yes

**Data types:** Data dictionary

**How to access data:** The data that support the findings of this study are available upon reasonable request to the corresponding author (alain.lescoat@chu-rennes.fr) after validation by the EUSTAR board.

**When available:** With publication

### Supporting Documents

**Document types:** None

### Additional Information

**Who can access the data:** researchers whose proposed use of the data has been approved

**Types of analyses:** for any purpose if adapted

**Mechanisms of data availability:** after approval of a proposal by the EUSTAR Board
